# Supplementary material for: Systematic analysis of hematopoietic gene expression profiles for prognostic prediction in acute myeloid leukemia
Source: PubMed Central journal article supplement (PMC4657053; doi:10.1038/srep16987), 2015-11-24
Supplement: srep16987-s1.pdf [file srep16987-s1.pdf]

## **Supplementary Information**

### **Systematic analysis of hematopoietic gene expression profiles for prognostic prediction in acute myeloid leukemia**

Frederick S. Varn, Erik H. Andrews, Chao Cheng

Supplementary Figure S1: Page 2

Supplementary Table S1: Page 3

Supplementary Table S2: Page 9

Supplementary Table S3: Page 10

Supplementary Table S4: Page 11

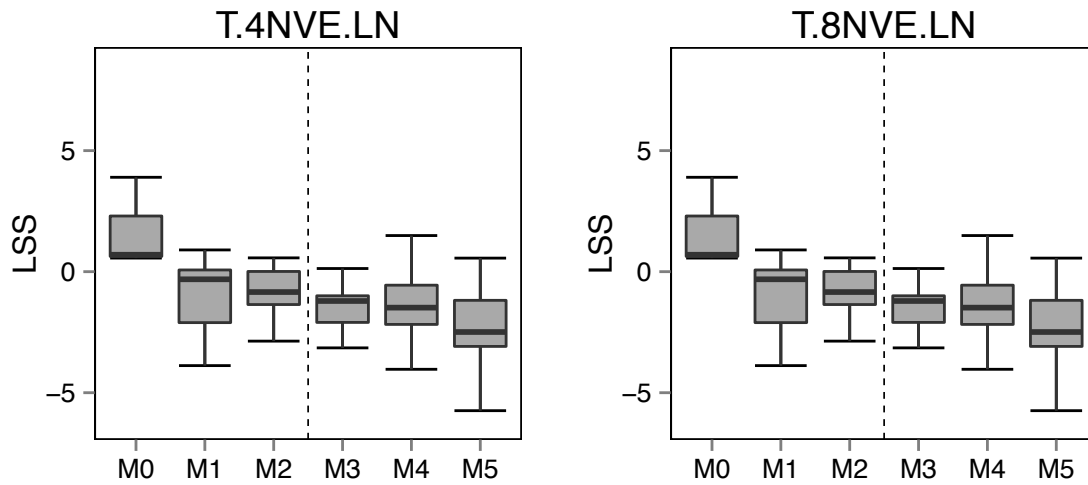

**Supplementary Figure S1. Association of naïve T Cell LSS with FAB subtype.** Distributions of the CD4+ naïve T cell (left) and CD8+ naïve T cell (right) LSS across the different FAB subtypes (M0-M5) available in the Bullinger dataset. There was a significant difference in LSS between the subtypes for both cell types ( $P = 4e-3$  and  $4e-4$ , Kruskal-Wallis, CD4+ naïve T cell and CD8+ naïve T cell, respectively). For all panels, box spans quartiles, with line representing median. Outliers were not removed. Whiskers represent absolute range excluding outliers.

**Supplementary Table S1. Univariate Cox PH Models for Hematopoietic Cell Types**

| Name                                  | P-val    | Adj.p-val | HR   | 95% CI      |
|---------------------------------------|----------|-----------|------|-------------|
| CD150negCD48neg.BM                    | 4.17E-05 | 0.01      | 1.17 | 1.08 - 1.25 |
| NKT.44posNK1.1pos.TH                  | 2.84E-04 | 0.03      | 0.81 | 0.72 - 0.91 |
| TGD.VG5pos.IEL.                       | 8.92E-04 | 0.07      | 0.73 | 0.60 - 0.88 |
| LTHSC.FL                              | 2.08E-03 | 0.08      | 1.09 | 1.03 - 1.14 |
| T.DN1neg2.TH                          | 2.39E-03 | 0.08      | 1.27 | 1.09 - 1.48 |
| X0negSTnegV1_SC.LT34F.BM              | 2.45E-03 | 0.08      | 1.06 | 1.02 - 1.10 |
| T.ETP.TH                              | 2.72E-03 | 0.08      | 1.21 | 1.07 - 1.36 |
| MLP.BM                                | 2.76E-03 | 0.08      | 1.08 | 1.03 - 1.14 |
| CD150negCD48neg.FL                    | 2.84E-03 | 0.08      | 1.09 | 1.03 - 1.16 |
| TGD.VG5pos.ACT.IEL.                   | 0.01     | 0.13      | 0.81 | 0.70 - 0.94 |
| X0negSTnegV1_DC.103neg11Bpos.LULN     | 0.01     | 0.19      | 0.92 | 0.86 - 0.98 |
| X0negSTnegV1_DC.PDC.8pos.SLN          | 0.01     | 0.21      | 0.79 | 0.66 - 0.95 |
| DC.LC.SK                              | 0.01     | 0.21      | 0.96 | 0.93 - 0.99 |
| DC.8neg4neg11Bpos.SLN                 | 0.01     | 0.21      | 0.88 | 0.79 - 0.97 |
| X0negSTnegV1_DC.103pos11Bneg.LULN     | 0.01     | 0.21      | 0.96 | 0.93 - 0.99 |
| T.8EFF.SP.OT1.D8.VSVOVA               | 0.02     | 0.23      | 0.92 | 0.85 - 0.98 |
| NK.Hpos.MCMV1.SP                      | 0.02     | 0.23      | 0.77 | 0.61 - 0.95 |
| DC8.LN                                | 0.02     | 0.23      | 0.90 | 0.83 - 0.98 |
| LTHSC.BM                              | 0.02     | 0.23      | 1.15 | 1.02 - 1.29 |
| MO.6CposIIneg.LN                      | 0.02     | 0.24      | 0.96 | 0.93 - 0.99 |
| DC7.LN                                | 0.02     | 0.24      | 0.91 | 0.85 - 0.99 |
| X0negSTnegV1_DC.PDC.8pos.MLN          | 0.02     | 0.24      | 0.82 | 0.70 - 0.97 |
| NK.Hpos.MCMV7.SP                      | 0.02     | 0.24      | 0.87 | 0.78 - 0.98 |
| DC.8neg4neg11Bneg.SLN                 | 0.02     | 0.24      | 0.93 | 0.88 - 0.99 |
| X0negSTnegV1_B6.14W.ABD.TR            | 0.03     | 0.25      | 0.89 | 0.80 - 0.99 |
| CLP                                   | 0.03     | 0.25      | 1.10 | 1.01 - 1.21 |
| X0negSTnegV1_SC.ST34F.BM              | 0.03     | 0.28      | 1.06 | 1.01 - 1.11 |
| DC4.MLN                               | 0.03     | 0.29      | 0.90 | 0.82 - 0.99 |
| DC.103pos.11Bneg.POLYIC.LU            | 0.04     | 0.29      | 0.95 | 0.90 - 1.00 |
| TGD.VG5neg.IEL                        | 0.04     | 0.29      | 0.89 | 0.79 - 0.99 |
| NK.MCMV7                              | 0.04     | 0.30      | 0.88 | 0.78 - 0.99 |
| DC9.LN                                | 0.04     | 0.30      | 0.96 | 0.92 - 1.00 |
| X0negSTnegV1_DC.11CLOSER.SALM3.SI     | 0.04     | 0.30      | 0.94 | 0.89 - 1.00 |
| X0negSTnegV1_DC.103neg11Bpos.SALM3.SI | 0.04     | 0.30      | 0.93 | 0.87 - 1.00 |
| DC.103CLOSER.SI                       | 0.05     | 0.31      | 0.89 | 0.79 - 1.00 |
| DC3.MLN                               | 0.05     | 0.31      | 0.94 | 0.89 - 1.00 |
| PROB.FRA.FL                           | 0.05     | 0.31      | 1.06 | 1.00 - 1.12 |
| NKT.4pos.SP                           | 0.05     | 0.31      | 0.94 | 0.89 - 1.00 |
| DC.103neg.11Bpos.POLYIC.LU            | 0.05     | 0.31      | 0.95 | 0.91 - 1.00 |
| DC.8neg4neg11Bpos.MLN                 | 0.05     | 0.31      | 0.94 | 0.87 - 1.00 |

|                                       |      |      |      |             |
|---------------------------------------|------|------|------|-------------|
| X0negSTnegV1_GN.ARTH.SYNF             | 0.05 | 0.31 | 0.96 | 0.93 - 1.00 |
| PREB.FRD.FL                           | 0.06 | 0.31 | 1.07 | 1.00 - 1.14 |
| T.DN2.TH                              | 0.06 | 0.31 | 1.06 | 1.00 - 1.12 |
| X0negSTnegV1_SC.MPP34F.BM             | 0.06 | 0.31 | 1.07 | 1.00 - 1.14 |
| X0negSTnegV1_T.DN1neg2.TH             | 0.06 | 0.33 | 1.06 | 1.00 - 1.12 |
| DC.103neg11Bpos.LV                    | 0.06 | 0.34 | 0.97 | 0.94 - 1.00 |
| X0negSTnegV1_SC.MEP.BM                | 0.07 | 0.36 | 1.05 | 1.00 - 1.11 |
| NK.HposMCMV1                          | 0.07 | 0.36 | 0.86 | 0.74 - 1.01 |
| X0negSTnegV1_DC.103pos11Bpos.SALM3.SI | 0.07 | 0.36 | 0.95 | 0.89 - 1.01 |
| T.8EFF.SP.OT1.D45VSV                  | 0.07 | 0.36 | 0.90 | 0.80 - 1.01 |
| DC.8neg4neg11Bneg.MLN                 | 0.08 | 0.36 | 0.96 | 0.92 - 1.00 |
| MLP.FL                                | 0.08 | 0.36 | 1.06 | 0.99 - 1.13 |
| TGD.VG2neg.ACT.SP                     | 0.08 | 0.36 | 0.97 | 0.93 - 1.00 |
| TGD.SP                                | 0.08 | 0.36 | 0.97 | 0.94 - 1.00 |
| PROB.CLP.FL                           | 0.08 | 0.36 | 1.05 | 0.99 - 1.11 |
| B614WABDTREG                          | 0.09 | 0.36 | 0.95 | 0.90 - 1.01 |
| DC.103pos11Bpos.SI                    | 0.09 | 0.36 | 0.91 | 0.81 - 1.01 |
| DC.103neg11Bpos.SI                    | 0.09 | 0.36 | 0.90 | 0.80 - 1.02 |
| DC2.LU                                | 0.10 | 0.38 | 0.98 | 0.95 - 1.00 |
| T.4MEM44H62L.SP                       | 0.10 | 0.38 | 0.89 | 0.78 - 1.02 |
| TGD.VG2neg.SP.TCRBKO                  | 0.10 | 0.38 | 0.96 | 0.90 - 1.01 |
| T.8EFF.SP.OT1.D10.LISOVA              | 0.10 | 0.38 | 0.93 | 0.84 - 1.02 |
| X0negSTnegV1_MF.MEDL.SLN              | 0.11 | 0.38 | 0.99 | 0.99 - 1.00 |
| X0negSTnegV1_DC.103neg11Bpos24pos.LU  | 0.11 | 0.38 | 0.99 | 0.97 - 1.00 |
| DC1.SP                                | 0.11 | 0.38 | 0.91 | 0.82 - 1.02 |
| NK.SP                                 | 0.11 | 0.38 | 0.94 | 0.88 - 1.01 |
| MO.6CnegIIpos.BL                      | 0.11 | 0.38 | 0.97 | 0.94 - 1.01 |
| X0negSTnegV1_GN.BL                    | 0.11 | 0.38 | 0.96 | 0.91 - 1.01 |
| X0negSTnegV1_MF.169pos11CHI.SLN       | 0.11 | 0.38 | 0.98 | 0.96 - 1.00 |
| NKT.4neg.LV                           | 0.11 | 0.38 | 0.94 | 0.88 - 1.01 |
| MICROGLIA.CNS                         | 0.12 | 0.38 | 0.97 | 0.94 - 1.01 |
| MO.6CnegIIneg.BM                      | 0.12 | 0.38 | 0.98 | 0.96 - 1.00 |
| NKT.4neg.SP                           | 0.12 | 0.38 | 0.94 | 0.86 - 1.02 |
| X0negSTnegV1_MF.SBCAPS.SLN            | 0.12 | 0.38 | 0.99 | 0.97 - 1.00 |
| DC.11CLOSER.SI                        | 0.12 | 0.38 | 0.92 | 0.82 - 1.02 |
| DC.8neg4neg11Bneg.SP                  | 0.12 | 0.39 | 0.92 | 0.83 - 1.02 |
| X0negSTnegV1_GN.ARTH.BM               | 0.12 | 0.39 | 0.95 | 0.90 - 1.01 |
| DC.PDC.8neg.SP                        | 0.13 | 0.40 | 0.95 | 0.88 - 1.02 |
| X0negSTnegV1_GN.THIO.PC               | 0.13 | 0.40 | 0.96 | 0.91 - 1.01 |
| X0negSTnegV1_GN.URAC.PC               | 0.13 | 0.40 | 0.96 | 0.90 - 1.01 |
| DC2.SP                                | 0.14 | 0.40 | 0.93 | 0.84 - 1.02 |
| PROB.FRBC.FL                          | 0.14 | 0.40 | 1.05 | 0.99 - 1.11 |
| MO.6CposIIpos.BL                      | 0.14 | 0.40 | 0.95 | 0.89 - 1.02 |

|                                      |      |      |      |             |
|--------------------------------------|------|------|------|-------------|
| PROB.FRBC.BM                         | 0.14 | 0.40 | 1.05 | 0.98 - 1.13 |
| T.8EFF.SP.OT1.D8.LISOVA              | 0.14 | 0.40 | 0.95 | 0.88 - 1.02 |
| TGD.VG2pos.SP.TCRBKO                 | 0.14 | 0.40 | 0.97 | 0.93 - 1.01 |
| NK.49Clpos.SP                        | 0.15 | 0.41 | 0.96 | 0.90 - 1.02 |
| PROB.CLP.BM                          | 0.15 | 0.41 | 1.05 | 0.98 - 1.13 |
| T.8NVE.SP                            | 0.15 | 0.41 | 0.96 | 0.92 - 1.01 |
| IMMTGD.VG2pos.TH                     | 0.15 | 0.41 | 1.07 | 0.98 - 1.16 |
| X0negSTnegV1_DC.103pos11Bneg.LU      | 0.16 | 0.41 | 0.94 | 0.87 - 1.02 |
| DC.8neg.TH                           | 0.16 | 0.42 | 0.96 | 0.91 - 1.02 |
| MO.6CnegIIINT.BL                     | 0.16 | 0.42 | 0.96 | 0.90 - 1.02 |
| T.DN3B.TH                            | 0.17 | 0.44 | 1.06 | 0.98 - 1.14 |
| MO.6CposIIneg.BL                     | 0.17 | 0.44 | 0.95 | 0.88 - 1.02 |
| T.8EFF.SP.OT1.D15LIS                 | 0.19 | 0.46 | 0.94 | 0.87 - 1.03 |
| X0negSTnegV1_T.DN2B.TH               | 0.19 | 0.46 | 1.04 | 0.98 - 1.10 |
| X0negSTnegV1_SC.CMP.BM.DR            | 0.19 | 0.46 | 1.04 | 0.98 - 1.11 |
| MO.6CnegIIneg.BL                     | 0.19 | 0.46 | 0.97 | 0.93 - 1.01 |
| MO.6CposIIneg.BM                     | 0.20 | 0.46 | 0.98 | 0.96 - 1.01 |
| T.DN3neg4.TH                         | 0.20 | 0.46 | 1.05 | 0.97 - 1.14 |
| MATTGD.VG1pos.TH.B6                  | 0.20 | 0.46 | 0.96 | 0.91 - 1.02 |
| X0negSTnegV1_DC.103neg11Bpos24neg.LU | 0.20 | 0.46 | 0.99 | 0.99 - 1.00 |
| DC6.LN                               | 0.20 | 0.46 | 0.98 | 0.95 - 1.01 |
| NK.49CIneg.SP                        | 0.20 | 0.46 | 0.96 | 0.90 - 1.02 |
| DC.103pos11Bneg.SI                   | 0.20 | 0.46 | 0.95 | 0.88 - 1.03 |
| DC2.MLN                              | 0.21 | 0.46 | 0.98 | 0.95 - 1.01 |
| DC1.LN                               | 0.21 | 0.46 | 0.96 | 0.90 - 1.02 |
| DC.103pos11Bneg.LV                   | 0.21 | 0.46 | 0.98 | 0.95 - 1.01 |
| B.T2.SP                              | 0.21 | 0.46 | 1.05 | 0.97 - 1.14 |
| X0negSTnegV1_T.DN2A.TH               | 0.22 | 0.46 | 1.02 | 0.99 - 1.05 |
| T.DN2neg3.TH                         | 0.22 | 0.46 | 1.04 | 0.98 - 1.11 |
| T.8EFF.SP.OT1.D8LISO                 | 0.22 | 0.46 | 0.91 | 0.78 - 1.06 |
| T.8EFF.SP.OT1.D15.LISOVA             | 0.23 | 0.46 | 0.97 | 0.93 - 1.02 |
| NK.DAP12neg.SP                       | 0.23 | 0.46 | 0.92 | 0.80 - 1.05 |
| GN.BM                                | 0.23 | 0.46 | 0.95 | 0.88 - 1.03 |
| T.4MEM.SP                            | 0.23 | 0.46 | 0.93 | 0.82 - 1.05 |
| DC3.SP                               | 0.23 | 0.46 | 0.98 | 0.95 - 1.01 |
| FRC.MLN                              | 0.23 | 0.46 | 0.95 | 0.88 - 1.03 |
| X0negSTnegV1_T.ETP.TH                | 0.24 | 0.47 | 1.02 | 0.99 - 1.05 |
| TGD.TH                               | 0.24 | 0.47 | 1.06 | 0.96 - 1.18 |
| MF.THIO5.IIpos480INT.PC              | 0.24 | 0.47 | 0.98 | 0.94 - 1.02 |
| FRC.SLN                              | 0.25 | 0.48 | 0.95 | 0.88 - 1.03 |
| NK.49Hneg.SP                         | 0.25 | 0.48 | 0.93 | 0.82 - 1.05 |
| MF.LU                                | 0.25 | 0.48 | 0.97 | 0.93 - 1.02 |
| T.ISP.TH                             | 0.25 | 0.48 | 1.04 | 0.97 - 1.12 |

|                                          |      |      |      |             |
|------------------------------------------|------|------|------|-------------|
| T.8MEM.SP.OT1.D45.LISOVA                 | 0.26 | 0.48 | 0.93 | 0.82 - 1.05 |
| MF.RP.SP                                 | 0.26 | 0.48 | 0.93 | 0.82 - 1.06 |
| T.DN3A.TH                                | 0.27 | 0.49 | 1.05 | 0.96 - 1.14 |
| EP.MECHI.TH                              | 0.27 | 0.50 | 0.98 | 0.95 - 1.02 |
| FI.SK                                    | 0.27 | 0.50 | 0.97 | 0.91 - 1.03 |
| IMMTGD.VG2.E17.TH                        | 0.28 | 0.50 | 1.05 | 0.96 - 1.14 |
| T.8MEM.SP.OT1.D106.VSVOVA                | 0.28 | 0.50 | 0.98 | 0.94 - 1.02 |
| T.8EFF.SP.OT1.D6.VSVOVA                  | 0.28 | 0.50 | 0.96 | 0.90 - 1.03 |
| T.DPBL.TH                                | 0.29 | 0.51 | 1.04 | 0.97 - 1.11 |
| NK.DAP10neg.SP                           | 0.29 | 0.51 | 0.94 | 0.85 - 1.05 |
| X0negSTnegV1_B6.14W.LN.TR                | 0.29 | 0.51 | 0.91 | 0.76 - 1.09 |
| X0negSTnegV1_B.FO.LN                     | 0.30 | 0.51 | 0.89 | 0.72 - 1.11 |
| DC.PDC.8pos.SP                           | 0.30 | 0.51 | 0.97 | 0.90 - 1.03 |
| T.8EFF.SP.OT1.D15.VSVOVA                 | 0.31 | 0.53 | 0.96 | 0.89 - 1.04 |
| DC2.LN                                   | 0.32 | 0.53 | 0.99 | 0.97 - 1.01 |
| X0negSTnegV1_T.8EFF.SP.OT1.24HR.LISOVA   | 0.32 | 0.53 | 1.03 | 0.97 - 1.10 |
| TGD.VG2pos.ACT.SP                        | 0.33 | 0.55 | 0.98 | 0.95 - 1.02 |
| X0negSTnegV1_ST.31neg38neg44neg.SLN      | 0.34 | 0.56 | 0.98 | 0.93 - 1.03 |
| X0negSTnegV1_DC.103pos11Bneg.SALM3.SI    | 0.35 | 0.57 | 0.95 | 0.85 - 1.06 |
| B.FRE.BM                                 | 0.35 | 0.57 | 0.89 | 0.69 - 1.14 |
| MF.THIO5.IIneg480HI.PC                   | 0.36 | 0.58 | 0.98 | 0.95 - 1.02 |
| IMMTGD.VG1posVD6pos.TH.B6                | 0.37 | 0.59 | 1.04 | 0.95 - 1.14 |
| IMMTGD.VG1pos.TH.B6                      | 0.38 | 0.60 | 1.04 | 0.95 - 1.14 |
| MF.THIO5.IIneg480INT.PC                  | 0.38 | 0.60 | 0.98 | 0.93 - 1.03 |
| MATTGD.VG3.E17.TH                        | 0.39 | 0.61 | 1.03 | 0.96 - 1.11 |
| X0negSTnegV1_MATTGD.VG2pos.TH            | 0.39 | 0.61 | 1.03 | 0.96 - 1.10 |
| PREB.FRC.BM                              | 0.40 | 0.61 | 1.03 | 0.96 - 1.11 |
| X0negSTnegV1_TGD.VG5pos24AHI.TH          | 0.40 | 0.61 | 1.03 | 0.96 - 1.11 |
| DC1.MLN                                  | 0.40 | 0.61 | 0.97 | 0.91 - 1.04 |
| FI.MTS15pos.TH                           | 0.40 | 0.61 | 0.97 | 0.89 - 1.05 |
| T.4.LN.BDC                               | 0.41 | 0.61 | 0.95 | 0.84 - 1.07 |
| TGD.VG5pos.ACT.IEL                       | 0.43 | 0.64 | 0.96 | 0.86 - 1.07 |
| DC.8pos.TH                               | 0.43 | 0.64 | 0.98 | 0.93 - 1.03 |
| T.4NVE.MLN                               | 0.44 | 0.64 | 0.97 | 0.91 - 1.04 |
| TGD.VG5neg.ACT.IEL                       | 0.44 | 0.64 | 0.91 | 0.72 - 1.15 |
| T.8MEM.LN                                | 0.45 | 0.65 | 0.98 | 0.92 - 1.04 |
| T.DN4.TH                                 | 0.45 | 0.65 | 1.03 | 0.96 - 1.10 |
| B.T3.SP                                  | 0.45 | 0.65 | 1.03 | 0.96 - 1.10 |
| B6SPLFO                                  | 0.45 | 0.65 | 1.03 | 0.96 - 1.11 |
| T.8EFF.SP.OT1.D6LISO                     | 0.46 | 0.65 | 1.01 | 0.98 - 1.05 |
| X0negSTnegV1_DC.103neg11BposF4neg80LO.KD | 0.46 | 0.65 | 0.98 | 0.91 - 1.04 |
| T.4NVE.LN                                | 0.46 | 0.65 | 0.96 | 0.85 - 1.08 |
| T.4.PLN.BDC                              | 0.48 | 0.67 | 0.96 | 0.86 - 1.08 |

|                                        |      |      |      |             |
|----------------------------------------|------|------|------|-------------|
| BEC.MLN                                | 0.50 | 0.69 | 0.95 | 0.84 - 1.09 |
| X0negSTnegV1_SC.CDP.BM                 | 0.52 | 0.71 | 0.98 | 0.94 - 1.03 |
| X0negSTnegV1_T.8EFF.SP.OT1.48HR.LISOVA | 0.52 | 0.71 | 1.02 | 0.97 - 1.07 |
| PROB.FRA.BM                            | 0.52 | 0.71 | 1.02 | 0.96 - 1.08 |
| T.8MEM.SP.OT1.D100.LISOVA              | 0.52 | 0.71 | 0.95 | 0.83 - 1.10 |
| T.4FP3pos25pos.SP                      | 0.53 | 0.71 | 0.98 | 0.91 - 1.05 |
| BEC.SLN                                | 0.53 | 0.71 | 0.96 | 0.84 - 1.09 |
| B1A.PC                                 | 0.53 | 0.71 | 0.92 | 0.70 - 1.20 |
| X0negSTnegV1_TGD.VG3pos24AHI.E17.TH    | 0.55 | 0.72 | 1.02 | 0.95 - 1.11 |
| X0negSTnegV1_T.8EFF.SP.OT1.12HR.LISOVA | 0.56 | 0.73 | 1.03 | 0.94 - 1.12 |
| T.4FP3neg.SP                           | 0.58 | 0.75 | 0.97 | 0.89 - 1.07 |
| PREB.FRD.BM                            | 0.58 | 0.75 | 1.02 | 0.95 - 1.09 |
| B.GC.SP                                | 0.59 | 0.76 | 1.02 | 0.94 - 1.11 |
| MF.THIO5.IIpos480LO.PC                 | 0.62 | 0.79 | 0.99 | 0.94 - 1.04 |
| FRA                                    | 0.62 | 0.79 | 1.01 | 0.96 - 1.06 |
| B614WLNTREG                            | 0.63 | 0.80 | 0.97 | 0.85 - 1.11 |
| T.8MEM.SP                              | 0.66 | 0.83 | 1.03 | 0.91 - 1.16 |
| NK.B2Mneg.SP                           | 0.66 | 0.83 | 0.98 | 0.87 - 1.09 |
| T.8NVE.PP                              | 0.67 | 0.84 | 0.99 | 0.94 - 1.04 |
| MF.IIneg480HI.PC                       | 0.68 | 0.84 | 0.99 | 0.95 - 1.04 |
| X0negSTnegV1_SC.MDP.BM                 | 0.69 | 0.85 | 1.01 | 0.96 - 1.06 |
| NKT.44negNK1.1neg.TH                   | 0.70 | 0.85 | 1.02 | 0.92 - 1.12 |
| LEC.SLN                                | 0.70 | 0.85 | 0.97 | 0.84 - 1.13 |
| B.T1.SP                                | 0.71 | 0.85 | 0.95 | 0.74 - 1.23 |
| X0negSTnegV1_B.FO.MLN                  | 0.72 | 0.86 | 0.95 | 0.71 - 1.27 |
| T.4MEM44H62L.LN                        | 0.72 | 0.86 | 0.98 | 0.88 - 1.09 |
| T.8EFF.SP.OT1.D5.VSVOVA                | 0.72 | 0.86 | 0.99 | 0.93 - 1.05 |
| T.8NVE.LN                              | 0.72 | 0.86 | 0.98 | 0.89 - 1.08 |
| MF.BM                                  | 0.74 | 0.86 | 0.99 | 0.96 - 1.03 |
| TGD.VG2pos.SP                          | 0.74 | 0.86 | 1.01 | 0.94 - 1.09 |
| B1A.SP                                 | 0.74 | 0.86 | 0.97 | 0.80 - 1.17 |
| B.FRE.FL                               | 0.75 | 0.87 | 0.97 | 0.83 - 1.14 |
| LEC.MLN                                | 0.76 | 0.88 | 0.98 | 0.84 - 1.14 |
| NK.49Hpos.SP                           | 0.79 | 0.91 | 0.98 | 0.88 - 1.11 |
| T.8EFF.SP.OT1.D10LIS                   | 0.80 | 0.92 | 1.02 | 0.87 - 1.20 |
| T.4.PA.BDC                             | 0.82 | 0.92 | 1.01 | 0.92 - 1.10 |
| T.8SP69pos.TH                          | 0.82 | 0.92 | 0.99 | 0.92 - 1.07 |
| MATTGD.VG1posVD6pos.TH.B6              | 0.84 | 0.94 | 0.99 | 0.89 - 1.09 |
| T.4INT8pos.TH                          | 0.84 | 0.94 | 1.01 | 0.93 - 1.09 |
| NKT.4pos.LV                            | 0.85 | 0.94 | 1.02 | 0.85 - 1.22 |
| B.FO.PC                                | 0.85 | 0.94 | 0.99 | 0.89 - 1.10 |
| B.FRF.BM                               | 0.86 | 0.94 | 0.99 | 0.85 - 1.15 |
| T.4NVE.SP                              | 0.86 | 0.94 | 1.01 | 0.95 - 1.07 |

|                         |      |      |      |             |
|-------------------------|------|------|------|-------------|
| T.4MEM.LN               | 0.86 | 0.94 | 0.99 | 0.92 - 1.07 |
| T.8SP24neg.TH           | 0.86 | 0.94 | 1.01 | 0.92 - 1.10 |
| T.8SP24INT.TH           | 0.87 | 0.94 | 1.01 | 0.92 - 1.11 |
| T.4NVE.PP               | 0.88 | 0.94 | 1.01 | 0.92 - 1.10 |
| T.8EFF.SP.OT1.D6.LISOVA | 0.88 | 0.94 | 0.99 | 0.93 - 1.07 |
| T.8NVE.MLN              | 0.89 | 0.94 | 0.99 | 0.88 - 1.11 |
| T.4pos8INT.TH           | 0.90 | 0.95 | 1.00 | 0.93 - 1.08 |
| NKT.44posNK1.1neg.TH    | 0.93 | 0.98 | 1.00 | 0.91 - 1.09 |
| T.DPSM.TH               | 0.93 | 0.98 | 1.00 | 0.89 - 1.11 |
| TGD.VG2neg.SP           | 0.94 | 0.98 | 1.00 | 0.93 - 1.09 |
| B1B.PC                  | 0.96 | 0.99 | 1.00 | 0.92 - 1.08 |
| DC.IIpos480LO.PC        | 0.96 | 0.99 | 1.00 | 0.95 - 1.05 |
| T.DP.TH                 | 0.97 | 0.99 | 1.00 | 0.92 - 1.08 |
| GMP.BM                  | 0.97 | 0.99 | 1.00 | 0.96 - 1.04 |
| B.MZ.SP                 | 0.98 | 1.00 | 1.00 | 0.77 - 1.28 |
| T.4SP24INT.TH           | 0.99 | 1.00 | 1.00 | 0.91 - 1.10 |
| T.DP69pos.TH            | 0.99 | 1.00 | 1.00 | 0.92 - 1.09 |
| T.4SP24neg.TH           | 0.99 | 1.00 | 1.00 | 0.92 - 1.09 |
| T.4SP69pos.TH           | 1.00 | 1.00 | 1.00 | 0.91 - 1.09 |
| T.8NVE.SP.OT1           | 1.00 | 1.00 | 1.00 | 0.95 - 1.05 |

Results from a univariate Cox PH model correlating LSSs from each murine hematopoietic cell type with patient survival. Cell types are arranged in ascending order of p-value.



**Supplementary Table S2: STRSC Multivariate Cox PH Model**

| <b>Covariate</b>                          | <b>HR</b> | <b>95% CI</b> | <b>Z</b> | <b>P-val</b> |
|-------------------------------------------|-----------|---------------|----------|--------------|
| STRSC LSS                                 | 1.12      | 1.01 - 1.23   | 2.20     | 0.03         |
| <i>FLT3</i> mutation                      | 2.09      | 1.05 - 4.13   | 2.11     | 0.04         |
| Age                                       | 1.02      | 0.99 - 1.04   | 1.48     | 0.14         |
| FAB subtype                               | 0.83      | 0.67 - 1.04   | -1.59    | 0.11         |
| Cytogenetic risk, intermediate: favorable | 1.49      | 0.71 - 3.13   | 1.05     | 0.29         |
| Cytogenetic risk, poor: favorable         | 2.94      | 1.09 - 7.88   | 2.14     | 0.03         |
| Preceding malignancy                      | 3.43      | 1.39 - 8.48   | 2.67     | 8.00E-03     |

The STRSC LSS remains predictive in a Cox PH model even after adjusting for common clinical variables including *FLT3* mutation status, age, FAB subtype, cytogenetic risk category, and preceding malignancy.

**Supplementary Table S3: Univariate Cox PH Model for Human Cell Types (GSE24006)**

| <b>Name</b> | <b>P-val</b> | <b>Adj p-val</b> | <b>HR</b> | <b>95% CI</b> |
|-------------|--------------|------------------|-----------|---------------|
| HSC         | 1.00E-03     | 0.01             | 1.04      | 1.02 - 1.07   |
| MPP         | 6.00E-03     | 0.03             | 1.02      | 1.01 - 1.04   |
| BM.GMP      | 0.06         | 0.15             | 0.98      | 0.97 - 1.00   |
| BM.CMP      | 0.14         | 0.29             | 0.99      | 0.98 - 1.00   |
| MEP         | 0.25         | 0.40             | 0.99      | 0.98 - 1.01   |
| AML.BLAST   | 0.65         | 0.78             | 0.99      | 0.96 - 1.03   |
| AML.LSC     | 0.68         | 0.78             | 0.99      | 0.94 - 1.04   |
| AML.LPC     | 0.79         | 0.79             | 0.99      | 0.92 - 1.07   |

A univariate Cox PH model reveals that the hematopoietic stem cell (HSC) and normal multipotent progenitor cell (MPP) LSSs are significantly associated with patient survival. Cell types are arranged in ascending order of p-value.

**Supplementary Table S4: Univariate Cox PH Model for Dedifferentiated Human Cell Types (GSE24759)**

| <b>Name</b>                            | <b>P-val</b> | <b>Adj p-val</b> | <b>HR</b> | <b>95% CI</b> |
|----------------------------------------|--------------|------------------|-----------|---------------|
| Megakaryocyte.erythroid.progenitor     | 5.35E-03     | 0.02             | 1.09      | 1.03 - 1.16   |
| Hematopoietic.stem.cell_CD38n.CD34p    | 0.02         | 0.03             | 1.03      | 1.01 - 1.06   |
| Hematopoietic.stem.cell_CD133p.CD34dim | 0.03         | 0.04             | 1.04      | 1.00 - 1.08   |
| Common.myeloid.progenitor              | 0.59         | 0.59             | 1.00      | 0.99 - 1.02   |

A univariate Cox PH model reveals that LSSs from three out of dedifferentiated human cell types, the megakaryocyte erythroid progenitor, the CD133+ CD34 diminished HSC, and the CD38- CD34+ HSC, are significantly associated with patient survival. Cell types are arranged in ascending order of p-value.
